# Supplementary material for: Resistance mechanisms for Gram-negative bacteria-specific lipopeptides, turnercyclamycins, differ from that of colistin
Source: PubMed Central journal article supplement (PMC10714751; doi:10.1128/spectrum.02306-23), 2023-10-26
Supplement: spectrum.02306-23-s0001.pdf [file spectrum.02306-23-s0001.pdf]

**SUPPLEMENTAL INFORMATION for:**

**Resistance mechanisms for Gram-negative bacteria-specific lipopeptide, turnercyclamycins, differ from that of colistin**

Albebson L. Lim<sup>a</sup>, Bailey W. Miller<sup>a</sup>, Zhenjian Lin<sup>a</sup>, Mark A. Fisher<sup>b</sup>, Louis R. Barrows<sup>c</sup>, Margo G. Haygood<sup>a</sup>, Eric W. Schmidt<sup>a#</sup>

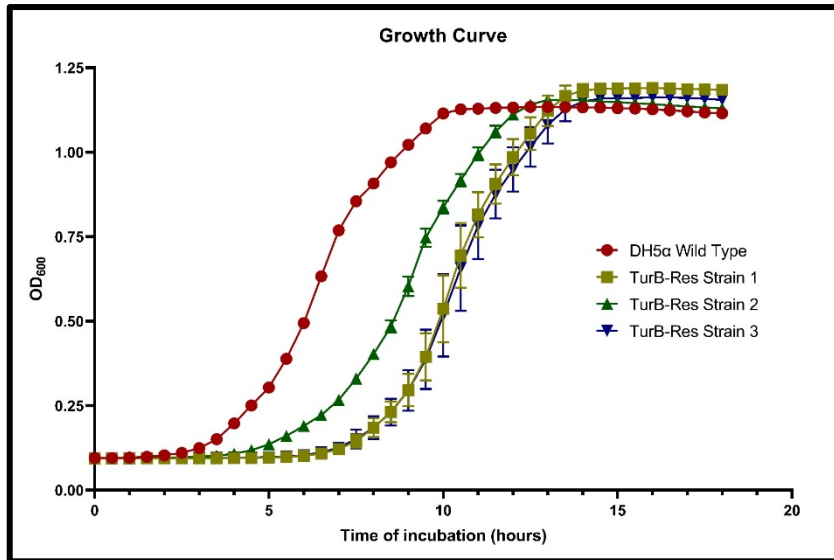

**Figure S1. Growth curve of wild type and turnercyclamycin B-resistant *E. coli* DH5α strains.**

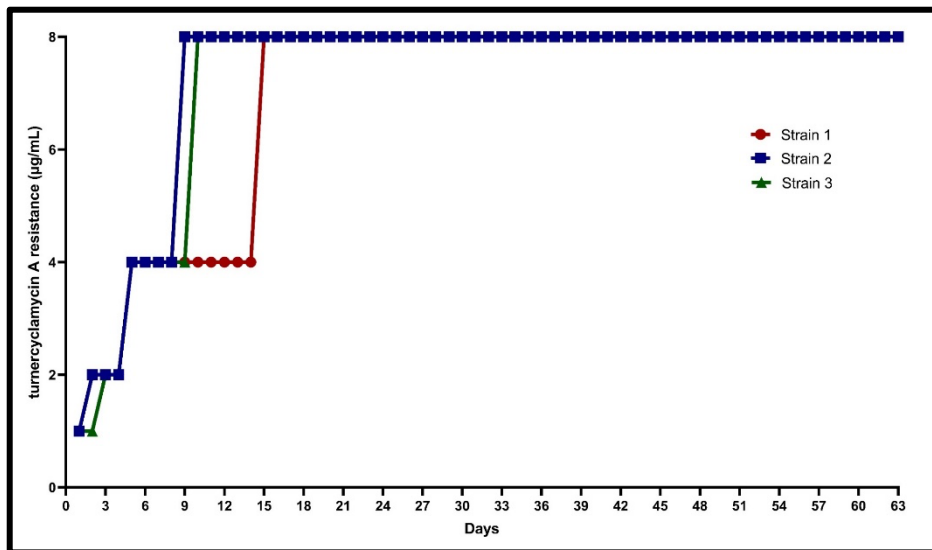

**Figure S2. Turnercyclamycin A-resistant mutants were generated by daily serial passaging of *E. coli* DH5α at sub-MIC concentrations of turnercyclamycin, leading to a steady shift in MIC of turnercyclamycin A. This experiment was performed in three biologically independent samples.**

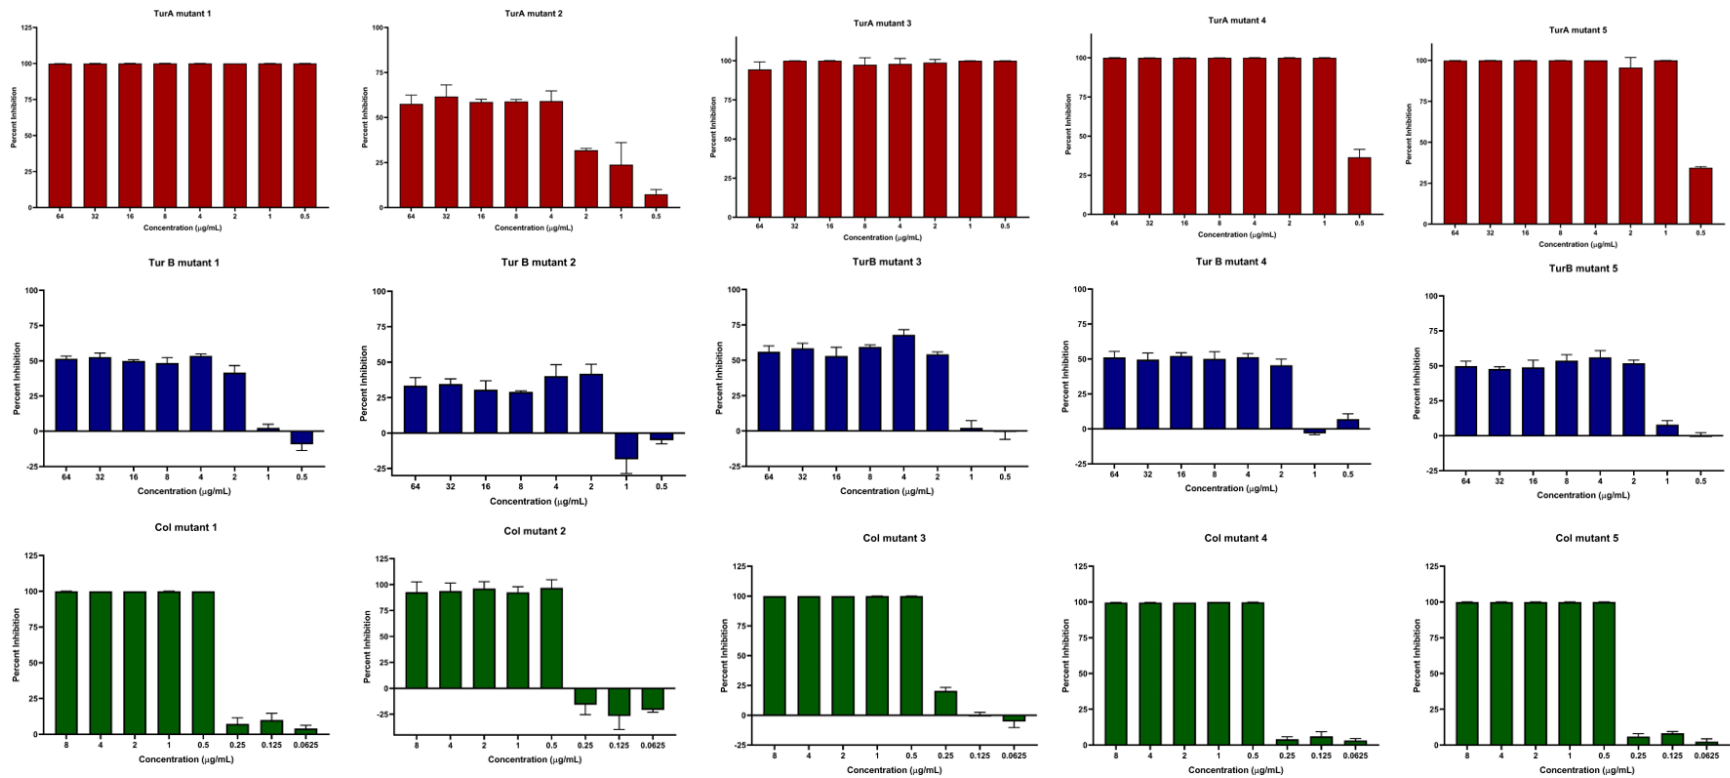

Figure S3. MICs against turnerycyclamycin B-resistant *E. coli* DH5 $\alpha$  using turnerycyclamycin A, turnerycyclamycin B, and colistin.

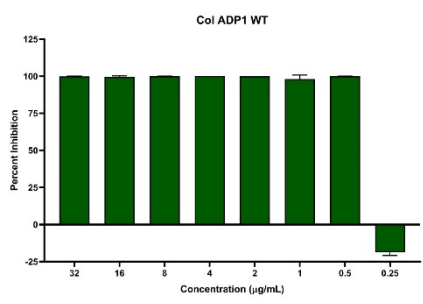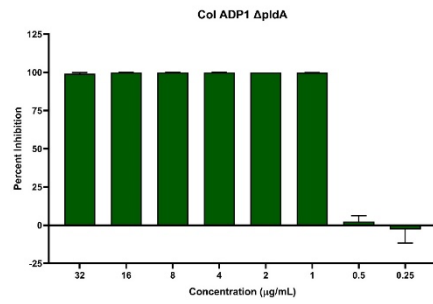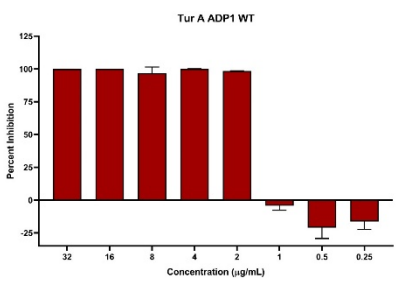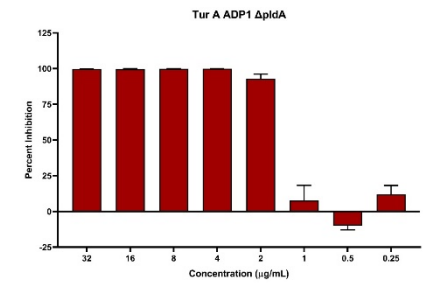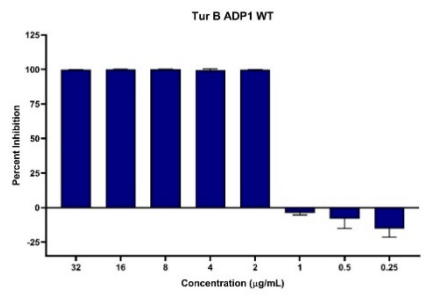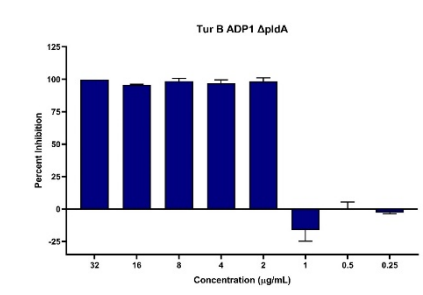

Figure S4. MICs of turnercyclamcyins A and B, and colistin against WT ADP1, and  $\Delta pldA$  *Acinetobacter baylyi* strains.

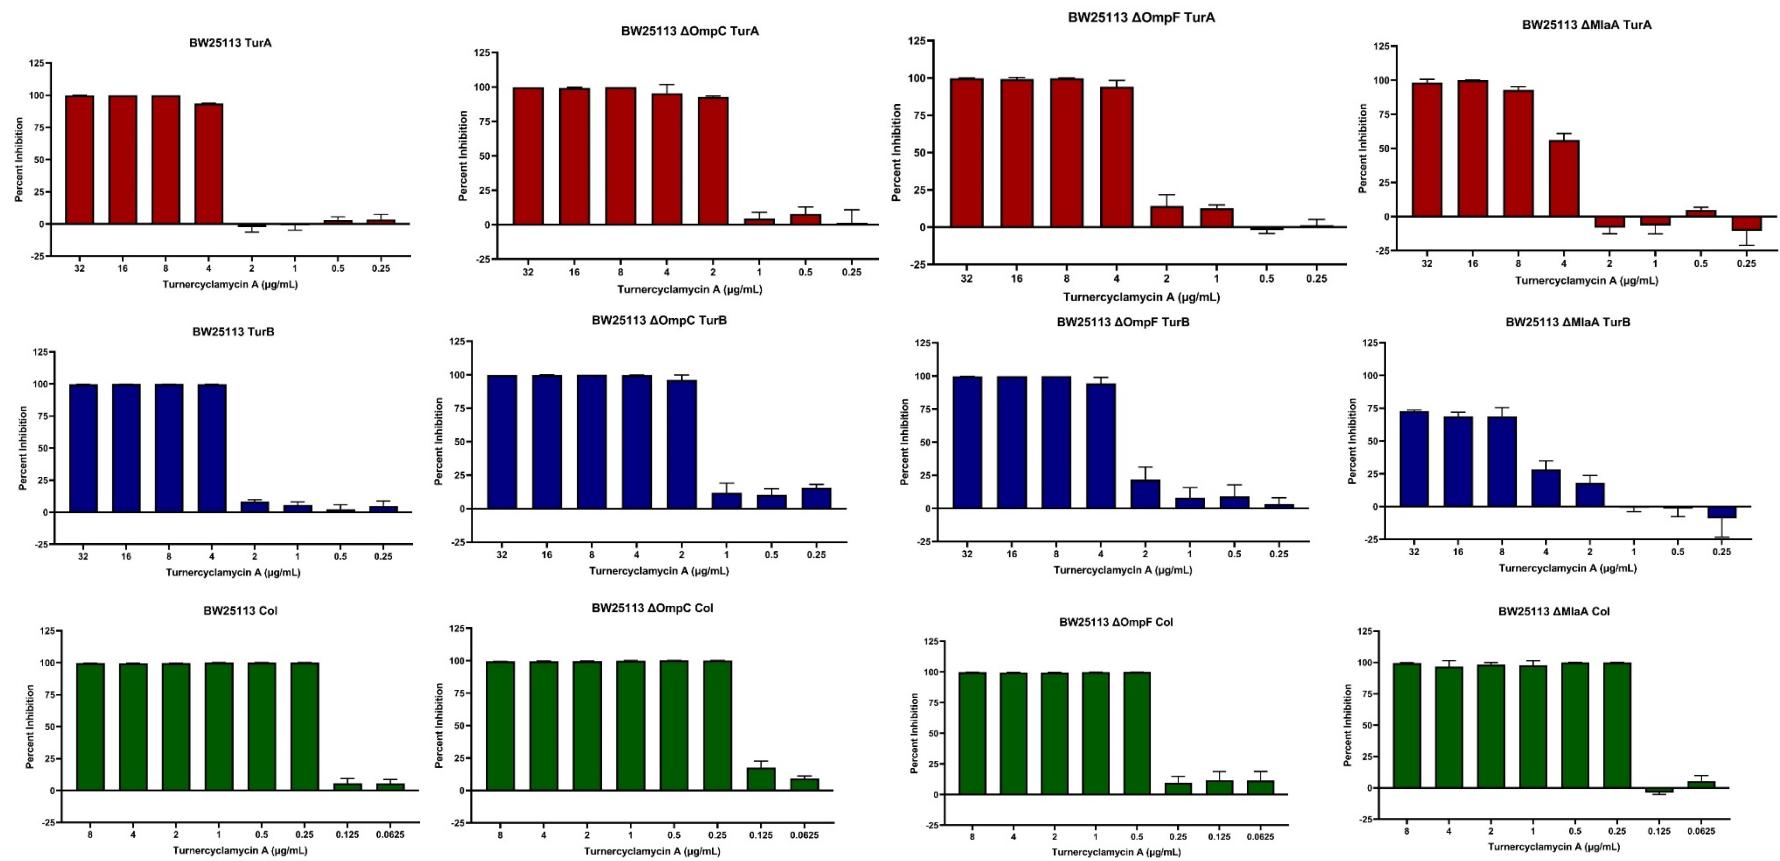

Figure S5. MICs of Keio strains BW25113 WT,  $\Delta ompC$ ,  $\Delta ompF$ , and  $\Delta mlaA$  *E. coli* strains against turnercyclamycins A and B, and colistin.

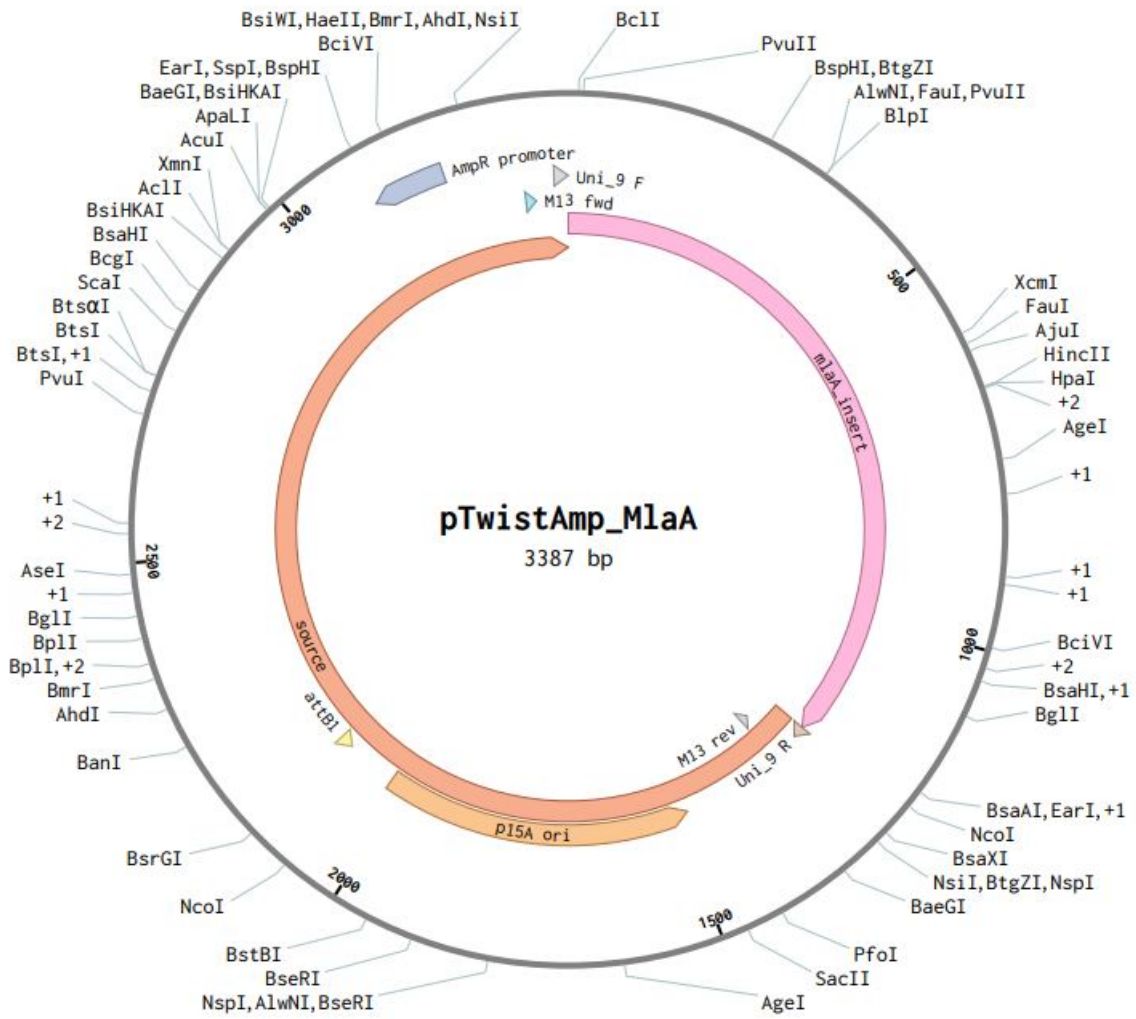

Figure S6. Plasmid map of pTwistAmp\_MlaA, complementation plasmid expressing MlaA protein.

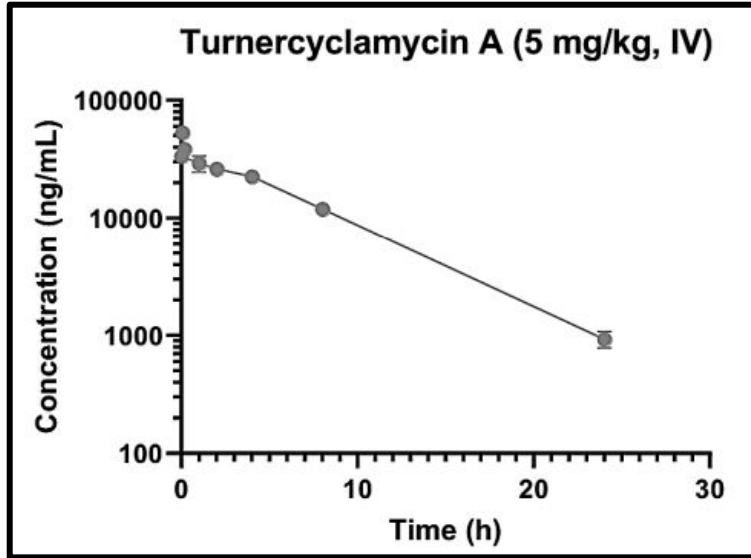

Figure S7. Plasma concentration collected during the duration of the PK experiments.

**Table S1:** Final results per mouse of thigh infection efficacy study. \*indicates significant difference between experimental counts and baseline counts. #indicates significant difference between experimental counts and vehicle control.

| Group | Treatment                    | Dose Route / Schedule  | Animal No. | Thigh Weight (g) | CFU/thigh Time post inoculation 2, 26 h | Decrease (%) | Log (CFU/thigh) Time post inoculation 2, 26 h | Δ      |
|-------|------------------------------|------------------------|------------|------------------|-----------------------------------------|--------------|-----------------------------------------------|--------|
| 1     | Baseline, 2 h post infection | N/A                    | 1          | 0.741            | $4.20 \times 10^5$                      |              | 5.62                                          |        |
|       |                              |                        | 2          | 0.683            | $6.99 \times 10^5$                      |              | 5.84                                          |        |
|       |                              |                        | 3          | 0.766            | $4.14 \times 10^5$                      |              | 5.62                                          |        |
|       |                              |                        | 4          | 0.798            | $5.91 \times 10^5$                      |              | 5.77                                          |        |
|       |                              |                        | 5          | 0.748            | $2.64 \times 10^4$                      |              | 4.42                                          |        |
|       |                              |                        | Mean       | 0.747            | $4.30 \times 10^5$                      | --           | 5.45                                          | --     |
|       |                              |                        | SEM        | 0.019            | $1.14 \times 10^5$                      |              | 0.26                                          |        |
| 2     | Vehicle (3% ethanol/PBS)     | 10 mL/kg IV, BID, q12h | 1          | 0.725            | $1.21 \times 10^8$                      |              | 8.08                                          |        |
|       |                              |                        | 2          | 0.738            | $2.96 \times 10^7$                      |              | 7.47                                          |        |
|       |                              |                        | 3          | 0.826            | $4.10 \times 10^7$                      |              | 7.61                                          |        |
|       |                              |                        | 4          | 0.813            | $1.30 \times 10^8$                      |              | 8.11                                          |        |
|       |                              |                        | 5          | 0.751            | $5.40 \times 10^7$                      |              | 7.73                                          |        |
|       |                              |                        | Mean       | 0.771            | $7.51 \times 10^7$                      | --           | 7.80                                          | 2.35   |
|       |                              |                        | SEM        | 0.020            | $2.10 \times 10^7$                      |              | 0.13                                          |        |
| 3     | Colistin                     | 30 mg/kg SC, BID, q12h | 1          | 0.718            | $1.77 \times 10^3$                      |              | 3.25                                          |        |
|       |                              |                        | 2          | 0.652            | $5.73 \times 10^3$                      |              | 3.76                                          |        |
|       |                              |                        | 3          | 0.648            | $5.64 \times 10^3$                      |              | 3.75                                          |        |
|       |                              |                        | 4          | 0.644            | $1.98 \times 10^3$                      |              | 3.30                                          |        |
|       |                              |                        | 5          | 0.739            | $3.57 \times 10^3$                      |              | 3.55                                          |        |
|       |                              |                        | Mean       | 0.680            | $3.74 \times 10^3$                      | 100          | 3.52*                                         | -2.73# |
|       |                              |                        | SEM        | 0.020            | $8.54 \times 10^2$                      |              | 0.11                                          |        |
| 4     |                              |                        | 1          | 0.644            | $5.91 \times 10^3$                      |              | 3.77                                          |        |

| Group | Treatment                                | Dose Route / Schedule    | Animal No. | Thigh Weight (g)                         | CFU/thigh Time post inoculation 2, 26 h | Decrease (%) | Log (CFU/thigh) Time post inoculation 2, 26 h | $\Delta$           |
|-------|------------------------------------------|--------------------------|------------|------------------------------------------|-----------------------------------------|--------------|-----------------------------------------------|--------------------|
|       | PT# 1251595 (UUM-2) (Turnercyclamycin A) | 25 mg/kg IV, BID, q12h   | 2          | 0.691                                    | $7.68 \times 10^3$                      |              | 3.89                                          |                    |
|       |                                          |                          | 3          | 0.602                                    | $8.76 \times 10^3$                      |              | 3.94                                          |                    |
|       |                                          |                          | 4          | 0.713                                    | $1.38 \times 10^4$                      |              | 4.14                                          |                    |
|       |                                          |                          | 5          | 0.709                                    | $1.89 \times 10^3$                      |              | 3.28                                          |                    |
|       |                                          |                          | Mean       | 0.672                                    | $7.61 \times 10^3$                      | 100          | 3.80*                                         | -1.65 <sup>#</sup> |
|       |                                          |                          | SEM        | 0.021                                    | $1.94 \times 10^3$                      |              | 0.14                                          |                    |
|       |                                          |                          | 5          | PT# 1251595 (UUM-2) (Turnercyclamycin A) | 12.5 mg/kg IV, BID, q12h                | 1            | 0.783                                         | $5.67 \times 10^5$ |
| 2     | 0.803                                    | $7.02 \times 10^6$       |            |                                          |                                         |              | 6.85                                          |                    |
| 3     | 0.771                                    | $7.89 \times 10^5$       |            |                                          |                                         |              | 5.90                                          |                    |
| 4     | 0.766                                    | $1.32 \times 10^5$       |            |                                          |                                         |              | 5.12                                          |                    |
| 5     | 0.752                                    | $1.35 \times 10^4$       |            |                                          |                                         |              | 4.13                                          |                    |
| Mean  | 0.775                                    | $1.70 \times 10^6$       |            |                                          |                                         | 98           | 5.55*                                         | 0.10               |
| SEM   | 0.009                                    | $1.34 \times 10^6$       |            |                                          |                                         |              | 0.45                                          |                    |
| 6     | PT# 1251595 (UUM-2) (Turnercyclamycin A) | 6.25 mg/kg IV, BID, q12h | 1          | 0.782                                    | $4.59 \times 10^7$                      |              | 7.66                                          |                    |
|       |                                          |                          | 2          | 0.821                                    | $3.63 \times 10^7$                      |              | 7.56                                          |                    |
|       |                                          |                          | 3          | 0.788                                    | $4.62 \times 10^7$                      |              | 7.66                                          |                    |
|       |                                          |                          | 4          | 0.753                                    | $6.93 \times 10^7$                      |              | 7.84                                          |                    |
|       |                                          |                          | 5          | 0.000                                    | $7.71 \times 10^7$                      |              | 7.89                                          |                    |
|       |                                          |                          | Mean       | 0.629                                    | $5.50 \times 10^7$                      | 27           | 7.72                                          | 2.27               |
|       |                                          |                          | SEM        | 0.158                                    | $7.76 \times 10^6$                      |              | 0.06                                          |                    |



**Table S2. PK parameters of turnercyclamycin A after 5mg/kg IV administration.  $t_{1/2}$ : halftime; C: concentration; AUC: area under the curve; D: dose; MRT: mean residence time; VSS: Vd at steady state; CL: clearance rate.**

| $t_{1/2}$ (h) | C0 (ng/mL) | AUClast (h*ng/mL) | AUCInf (h*ng/mL) | AUC/D (h*kg*ng/mL/mg) | AUC Extr (%) | MRT (h) | VSS (L/kg) | CL (ml/h/kg) |
|---------------|------------|-------------------|------------------|-----------------------|--------------|---------|------------|--------------|
| 4.35          | 33657      | 284562            | 290402           | 58080                 | 2.01         | 5.83    | 0.10       | 17.4         |
